# Supplementary material for: AGGRESCAN3D (A3D): server for prediction of aggregation properties of protein structures
Source: PubMed Central journal article supplement — Nucleic Acids Res. 2015 Apr 16;43(Web Server issue):W306–13. doi: 10.1093/nar/gkv359 (PMC4489226; doi:10.1093/nar/gkv359), 2015-04-16

## **SUPPLEMENTARY DATA**

### **METHODS**

#### **Calculation of algorithms performance:**

Sensitivity or true positive rate was calculated as:  $\text{Sensitivity} = \text{TP}/P = \text{TP}/(\text{TP}+\text{FN})$ .

Specificity or true negative rate was calculated as:  $\text{Specificity} = \text{TN}/N = \text{TN}/(\text{FP}+\text{TN})$ .

Precision or positive predictive value was calculated as:  $\text{Precision} = \text{TP}/(\text{TP}+\text{FP})$

Where P = Positives, N = Negatives, TP = True Positives, FP = False Positives, TN = True Negatives and FN = False Negatives.

Table S1: Set of 29 different WT proteins for which 3D-structures are available and changes in solubility upon mutation and expression have been characterized, accounting a total of 129 variants. PDBs, mutations and the corresponding references are indicated. Experimental data are compared with PROSOII, SolPro and A3D predictions. Green cells correspond to correct predictions whereas red cells indicate wrong predictions. True positives (TP), false positives (FP), true negatives (TN) and false negatives (FN) are indicated.

Figure S1: A3D prediction pipeline

Figure S2: The aggregation propensity of (a) Maltose Binding Protein (PDB: 4MBP) and (b) Ubiquitin (PDB: 1UBQ) are analysed using both sequence-based predictors and A3D. Amino acids with positive scores are indicated in different colours for each predictor: AGGRESCAN (green), Zyggregator (blue), FoldAmyloid (red), Tango (orange) and A3D (purple). Black bars indicate buried residues exposing  $< 15 \text{ \AA}^2$  (up) and  $< 30 \text{ \AA}^2$  (down) to solvent. Areas with high-predicted aggregation propensity are labelled according to a red gradient and areas with high-predicted solubility according to a blue gradient. White areas are not predicted to influence aggregation.

Figure S3: Aggregation profiles of deoxyhemoglobin S and A. The aggregation propensity of the  $\beta$ -chains of deoxyhemoglobin S (solid line) and deoxyhemoglobin A (dashed line) were predicted with A3D, Aggrescan, Zyggregator, FoldAmyloid and Tango. The algorithm threshold ( $Tr$ ) is shown as a solid red line. A3D is unique at pinpointing the large increase in aggregation propensity caused by the Glu6 to Val6 mutation. A3D predicts Val6 as the most aggregation-prone residue in deoxyhemoglobin S.

Figure S4: The oligomeric and monomeric forms of (a) TTR (PDB: 1TTA) and (b) SOD1 (PDB: 2C9V) were analysed with A3D. Color codes as in Figure S2. In both cases strong aggregation-prone regions in the monomer surface are protected at the interface of the native oligomer.

Figure S5: Comparison of A3D predictions for AcPDro2 (PDB: 1URR) in static (left) and dynamic (right) modes. The exposed aggregation-prone region shown in the dynamic analysis corresponds essentially to strand S5 and the preceding loop (Y89-I96) and strand S2 (W38).

Table S1

| PROTEINS                           |           |                                                       | Exp Data  | 1D-SEQ Predictions |              | AGGRESKAN 3D | References |
|------------------------------------|-----------|-------------------------------------------------------|-----------|--------------------|--------------|--------------|------------|
| Protein                            | PDB       | Mutations                                             |           | PROSOII score      | SolPro score |              |            |
| RNase SA                           | 1RGG:A    | Thr76Ala                                              | Increased | TP                 | TP           | FN           | [1]        |
|                                    |           | Thr76Arg                                              | Increased | FN                 | TP           | TP           |            |
|                                    |           | Thr76Asn                                              | Increased | TP                 | TP           | TP           |            |
|                                    |           | Thr76Asp                                              | Increased | TP                 | TP           | TP           |            |
|                                    |           | Thr76Cys                                              | Decreased | FP                 | FP           | TN           |            |
|                                    |           | Thr76Glu                                              | Increased | FN                 | TP           | TP           |            |
|                                    |           | Thr76Gly                                              | Increased | TP                 | FN           | FN           |            |
|                                    |           | Thr76His                                              | Increased | TP                 | TP           | TP           |            |
|                                    |           | Thr76Ile                                              | Decreased | FP                 | FP           | TN           |            |
|                                    |           | Thr76Leu                                              | Decreased | FP                 | FP           | TN           |            |
|                                    |           | Thr76Lys                                              | Increased | TP                 | TP           | TP           |            |
|                                    |           | Thr76Met                                              | Decreased | TN                 | FP           | TN           |            |
|                                    |           | Thr76Phe                                              | Decreased | FP                 | TN           | TN           |            |
|                                    |           | Thr76Pro                                              | Decreased | TN                 | FP           | TN           |            |
|                                    |           | Thr76Ser                                              | Increased | TP                 | TP           | TP           |            |
|                                    |           | Thr76Trp                                              | Decreased | FP                 | FP           | TN           |            |
| Thr76Val                           | Decreased | FP                                                    | FP        | TN                 |              |              |            |
| A beta 42                          | 1Z0Q:A    | Phe19Ala                                              | Increased | TP                 | TP           | TP           | [2]        |
|                                    |           | Phe19Arg                                              | Increased | TP                 | FN           | TP           |            |
|                                    |           | Phe19Asn                                              | Increased | TP                 | TP           | TP           |            |
|                                    |           | Phe19Asp                                              | Increased | TP                 | TP           | TP           |            |
|                                    |           | Phe19Cys                                              | Increased | TP                 | TP           | TP           |            |
|                                    |           | Phe19Gln                                              | Increased | TP                 | TP           | TP           |            |
|                                    |           | Phe19Glu                                              | Increased | TP                 | TP           | TP           |            |
|                                    |           | Phe19Gly                                              | Increased | TP                 | TP           | TP           |            |
|                                    |           | Phe19His                                              | Increased | TP                 | TP           | TP           |            |
|                                    |           | Phe19Ile                                              | Decreased | FP                 | FP           | TN           |            |
|                                    |           | Phe19Leu                                              | Increased | TP                 | TP           | TP           |            |
|                                    |           | Phe19Lys                                              | Increased | TP                 | TP           | TP           |            |
|                                    |           | Phe19Met                                              | Increased | TP                 | TP           | TP           |            |
|                                    |           | Phe19Pro                                              | Increased | TP                 | TP           | TP           |            |
|                                    |           | Phe19Ser                                              | Increased | TP                 | TP           | TP           |            |
|                                    |           | Phe19Thr                                              | Increased | TP                 | TP           | TP           |            |
| Phe19Trp                           | Increased | TP                                                    | TP        | TP                 |              |              |            |
| Phe19Tyr                           | Increased | TP                                                    | TP        | TP                 |              |              |            |
| Phe19Val                           | Increased | TP                                                    | TP        | TP                 |              |              |            |
| Hemoglobin                         | 2D60:B    | Glu6Leu                                               | Decreased | TN                 | TN           | TN           | [3]        |
|                                    |           | Glu6Phe                                               | Decreased | TN                 | TN           | TN           |            |
|                                    |           | Glu6Trp                                               | Decreased | TN                 | TN           | TN           |            |
| A beta 42                          | 1Z0Q:A    | Ile32Ser                                              | Decreased | FP                 | FP           | TN           | [4]        |
|                                    |           | Leu34Pro                                              | Increased | TP                 | TP           | TP           |            |
|                                    |           | Phe19Ser //<br>Leu34Pro                               | Increased | TP                 | TP           | TP           |            |
|                                    |           | Val12Ala //<br>Ile32Thr //<br>Leu34Pro                | Increased | TP                 | TP           | TP           |            |
|                                    |           | Val12Glu //<br>Val18Glu //<br>Met35Thr //<br>Ile41Asn | Increased | TP                 | TP           | TP           |            |
|                                    |           | Phe4Ile //<br>Ser8Pro //<br>Val24Ala //<br>Leu34Pro   | Increased | TP                 | TP           | TP           |            |
| Human HIV type 1 integrase         | 1BIZ:A    | Trp131Ala                                             | Increased | FN                 | FN           | TP           | [5]        |
|                                    |           | Val165Lys                                             | Increased | FN                 | TP           | TP           |            |
| FOP Protein                        | 2D68 A    | Leu104Met                                             | Decreased | FP                 | FP           | TN           | [6]        |
|                                    |           | Leu127Met                                             | Decreased | TN                 | TN           | TN           |            |
|                                    |           | Lys63Met                                              | Decreased | TN                 | FP           | TN           |            |
|                                    |           | Lys69Met                                              | Decreased | TN                 | FP           | TN           |            |
|                                    |           | Val74Phe                                              | Decreased | TN                 | FP           | TN           |            |
|                                    |           | Leu87Met                                              | Decreased | TN                 | FP           | TN           |            |
|                                    |           | Thr90Ala                                              | Decreased | TN                 | FP           | TN           |            |
|                                    |           | Glu97Ala                                              | Decreased | TN                 | TN           | TN           |            |
|                                    |           | Thr90Ala //<br>Glu97Ala                               | Decreased | TN                 | FP           | TN           |            |
| Human alpha-1 proteinase inhibitor | 8API:A    | Met358Leu                                             | Decreased | TN                 | FP           | TN           | [6]        |
|                                    |           | Thr345Leu //<br>Met358Arg                             | Decreased | TN                 | FP           | FP           |            |
|                                    |           | Met351Glu //<br>Met358Arg                             | Increased | FN                 | TP           | TP           |            |

|                                                     |        |                                                                                         |           |    |    |    |      |
|-----------------------------------------------------|--------|-----------------------------------------------------------------------------------------|-----------|----|----|----|------|
| Human Interleukin 1 Beta                            | 9ILB:A | Leu10Asn                                                                                | Decreased | TN | TN | TN |      |
|                                                     |        | Leu10Asp                                                                                | Decreased | TN | TN | TN |      |
|                                                     |        | Lys97Arg                                                                                | Increased | FN | FN | TP |      |
|                                                     |        | Lys97Gly                                                                                | Decreased | FP | TN | TN |      |
|                                                     |        | Lys97Val                                                                                | Decreased | FP | TN | TN |      |
| Plasmodium falciparum dihydrofolate reductase       | 1J3I:A | Lys27Glu                                                                                | Increased | TP | FN | TP | [7]  |
|                                                     |        | Tyr35Gln // Phe37Arg                                                                    | Increased | FN | TP | TP |      |
|                                                     |        | Tyr35Gly // Phe37Leu                                                                    | Increased | TP | TP | TP |      |
|                                                     |        | Tyr35Leu // Phe37Arg                                                                    | Increased | TP | TP | FN |      |
| HIV integrase                                       | 1BIZ:A | Lys185Asn                                                                               | Decreased | TN | TN | TN | [8]  |
|                                                     |        | Lys185Asp                                                                               | Decreased | TN | TN | TN |      |
|                                                     |        | Lys185Ile                                                                               | Decreased | TN | TN | TN |      |
|                                                     |        | Lys185Leu                                                                               | Decreased | TN | TN | TN |      |
|                                                     |        | Lys185Phe                                                                               | Decreased | TN | TN | TN |      |
| GP24                                                | 1YUE:A | Glu89Ala // Glu90Ala                                                                    | Decreased | TN | FP | TN | [9]  |
|                                                     |        | Ser1Phe // Lys9Val // Gln21Val // Lys58Val // Ser85Thr // Gly93Leu                      | Decreased | TN | TN | TN | [10] |
| Maltose Binding Protein                             | 1JW4:A | Trp232Glu                                                                               | Decreased | TN | FP | TN | [11] |
|                                                     |        | Tyr242Glu                                                                               | Decreased | FP | FP | TN |      |
|                                                     |        | Ile317Glu                                                                               | Decreased | FP | FP | TN |      |
|                                                     |        | Gly32Asp // Ile33Pro                                                                    | Decreased | FP | FP | FP |      |
| Type S1 dihydrofolate reductase                     | 2W9T:A | Asn48Glu                                                                                | Increased | TP | FN | TP | [12] |
|                                                     |        | Asn130Asp                                                                               | Increased | FN | TP | TP |      |
|                                                     |        | Asn48Glu // Asn130Asp                                                                   | Increased | FN | TP | TP |      |
| Potassium channel KcsA                              | 3EFF:K | Trp26Glu // Val93Glu // Leu24Asp // Leu81Arg // Leu116Arg                               | Increased | FN | FN | TP | [13] |
| Human translation initiation factor eIF2a           | 1Q8K:A | Ile27Gln // Ile46His // Val71Lys                                                        | Increased | TP | FN | TP | [14] |
| HIV type 1 integrase                                | 1B9D:A | Phe185Lys                                                                               | Increased | TP | FN | TP | [15] |
| Human apolipoprotein E C-terminal domain            | 2L7B:A | Phe257Ala // Trp264Arg // Val269Ala // Leu279Gln // Val287Glu                           | Increased | TP | TP | TP | [16] |
| Moloney murine leukemia virus reverse transcriptase | 4MH8:A | Leu435Lys                                                                               | Increased | TP | FN | TP | [17] |
| SIV integrase                                       | 1C6V:A | Phe185His                                                                               | Increased | TP | TP | TP | [18] |
| Human apolipoprotein D                              | 2HZR:A | Trp99His // Ile118Ser // Leu120Ser                                                      | Increased | TP | TP | TP | [19] |
| Cholera toxin A1 subunit                            | 1S5F:A | Phe132Ser                                                                               | Increased | TP | FN | TP | [20] |
| HhaI methyltransferase                              | 2C7O:A | Val213Ser                                                                               | Increased | TP | TP | TP | [21] |
| CD58                                                | 1CI5:A | Phe1Ser // Val9Lys // Val21Gln // Val58Lys // Thr85Ser // Leu93Gly                      | Increased | TP | TP | TP | [22] |
|                                                     |        | Ala155Glu // Asn160Lys // Met163Thr // Ala168Thr // Thr242Asn // Asn255Asp // Ala259Thr | Increased | TP | FN | TP |      |
|                                                     |        | Trp100Glu                                                                               | Increased | TP | FN | TP |      |
|                                                     |        | Trp100Gln, Trp138Gln                                                                    | Increased | TP | FN | TP |      |
|                                                     |        | His97Ser // Trp100Gln // Ala101Thr // Gly112Glu // Met136Ile // Trp138Gln // Gly145Glu  | Increased | TP | TP | TP |      |
| Catalytic domain of beta4gal-T1                     | 4L41:C | Ala155Glu // Asn160Lys // Met163Thr // Ala168Thr // Thr242Asn // Asn255Asp // Ala259Thr | Increased | TP | FN | TP | [23] |
| Human leptin                                        | 1AX8:A | Trp100Glu                                                                               | Increased | TP | FN | TP | [24] |
|                                                     |        | Trp100Gln, Trp138Gln                                                                    | Increased | TP | FN | TP |      |
|                                                     |        | His97Ser // Trp100Gln // Ala101Thr // Gly112Glu // Met136Ile // Trp138Gln // Gly145Glu  | Increased | TP | TP | TP |      |
|                                                     |        | Ser9Cys                                                                                 | Decreased | TN | FP | TN | [26] |
|                                                     |        | Glu6Lys                                                                                 | Decreased | FP | FP | TN | [27] |

|                                                                                                                                                                                |        |          |           |    |    |    |      |
|--------------------------------------------------------------------------------------------------------------------------------------------------------------------------------|--------|----------|-----------|----|----|----|------|
| VL                                                                                                                                                                             | 2BX5:A | Arg24Asp | Increased | TP | TP | TP | [28] |
|                                                                                                                                                                                |        | Ser26Asp | Increased | TP | TP | TP |      |
|                                                                                                                                                                                |        | Gln27Asp | Increased | FN | TP | FN |      |
|                                                                                                                                                                                |        | Ser28Asp | Increased | TP | TP | TP |      |
|                                                                                                                                                                                |        | Ile29Asp | Increased | FN | TP | TP |      |
|                                                                                                                                                                                |        | Ser30Asp | Increased | FN | TP | TP |      |
|                                                                                                                                                                                |        | Ser31Asp | Increased | FN | TP | TP |      |
|                                                                                                                                                                                |        | Tyr32Asp | Increased | FN | TP | TP |      |
|                                                                                                                                                                                |        | Asn34Asp | Increased | FN | TP | TP |      |
|                                                                                                                                                                                |        | Tyr49Asp | Increased | TP | TP | TP |      |
|                                                                                                                                                                                |        | Ala50Asp | Increased | TP | FN | TP |      |
|                                                                                                                                                                                |        | Ala51Asp | Increased | TP | TP | TP |      |
|                                                                                                                                                                                |        | Ser52Asp | Increased | FN | TP | TP |      |
|                                                                                                                                                                                |        | Ser53Asp | Increased | FN | TP | TP |      |
|                                                                                                                                                                                |        | Gln55Asp | Increased | TP | TP | TP |      |
|                                                                                                                                                                                |        | Ser56Asp | Increased | TP | FN | TP |      |
| VH                                                                                                                                                                             | 3UPC   | Gly26Asp | Increased | FN | TP | TP |      |
|                                                                                                                                                                                |        | Thr28Asp | Increased | FN | FN | TP |      |
|                                                                                                                                                                                |        | Ser30Asp | Increased | TP | FN | TP |      |
|                                                                                                                                                                                |        | Ser31Asp | Increased | FN | FN | TP |      |
|                                                                                                                                                                                |        | Tyr32Asp | Increased | FN | FN | TP |      |
|                                                                                                                                                                                |        | Ala33Asp | Increased | TP | FN | TP |      |
|                                                                                                                                                                                |        | Gln39Asp | Increased | TP | FN | FN |      |
|                                                                                                                                                                                |        | Ala40Asp | Increased | TP | FN | FN |      |
|                                                                                                                                                                                |        | Ala50Asp | Increased | FN | TP | TP |      |
|                                                                                                                                                                                |        | Ser52Asp | Increased | FN | TP | TP |      |
|                                                                                                                                                                                |        | Gly53Asp | Increased | FN | FN | TP |      |
|                                                                                                                                                                                |        | Ser54asp | Increased | FN | FN | TP |      |
|                                                                                                                                                                                |        | Gly55Asp | Increased | FN | FN | TP |      |
| <b>References</b>                                                                                                                                                              |        |          |           |    |    |    |      |
| [1] Trevino SR, Scholtz J, Pace C. 2007. <i>J Mol Biol</i> 366(2):449-460.                                                                                                     |        |          |           |    |    |    |      |
| [2] de Groot N, Aviles F, Vendrell J, Ventura S. 2006. <i>FEBS J</i> 273(3):658-668.                                                                                           |        |          |           |    |    |    |      |
| [3] Adachi K, Konitzer P, Kim J, Welch N, Surrey S. 1993. <i>J Biol Chem</i> 268:21650-21656.                                                                                  |        |          |           |    |    |    |      |
| [4] Fisher A, Kim W, DeLisa M. 2006. <i>Protein Sci</i> 15(3):449-58.                                                                                                          |        |          |           |    |    |    |      |
| [5] Idicula-Thomas S, Balaji PV. 2005. <i>Protein Sci</i> 14(3):582-592.                                                                                                       |        |          |           |    |    |    |      |
| [6] Sim J, Sim T. 1999. <i>Journal of Molecular Catalysis B: Enzymatic</i> 6(3):133-143.                                                                                       |        |          |           |    |    |    |      |
| [7] Japrun D, Chusacultanchai S, Yuvaniyama J, Wilairat P, Yuthavong Y. 2005 <i>Protein Eng Des Sel</i> , 18(10):457-64.                                                       |        |          |           |    |    |    |      |
| [8] Maxwell KL, Mittermaier AK, Forman-Kay JD, Davidson AR. 1999. <i>Protein Sci</i> 8(9):1908-1911.                                                                           |        |          |           |    |    |    |      |
| [9] Boeshans K, Liu F, Peng G, Idler W, Jang S, Marekov L, Black L, Ahvazi B. 2006. <i>Protein Expr Purif</i> 49(2):235-43.                                                    |        |          |           |    |    |    |      |
| [10] Sun ZYJ, Dotsch V, Kim M, Li J, Reinherz EL, Wagner G. 1999. <i>EMBO J</i> 18(11):2941-9.                                                                                 |        |          |           |    |    |    |      |
| [11] Wigley WC, Stidham RD, Smith NM, Hunt JF, Thomas PJ. 2001. <i>Nature Biotech</i> 19:131-136.                                                                              |        |          |           |    |    |    |      |
| [12] Dale GE, Broger C, Langen H, D'Arcy A, Stuber D. 1994. <i>Protein Eng</i> 7:933-939.                                                                                      |        |          |           |    |    |    |      |
| [13] Slovic AM, Kono H, Lear JD, Saven JG, DeGrado WF. 2004. <i>Proc Natl Acad Sci USA</i> 101:1828-1833.                                                                      |        |          |           |    |    |    |      |
| [14] Ito T, Wagner G. 2004. <i>J Biomol NMR</i> 28:357-367.                                                                                                                    |        |          |           |    |    |    |      |
| [15] Jenkins TM, Hickman AB, Dyda F, Ghirlando R, Davies DR, Craigie R. 1995. <i>Proc Natl Acad Sci USA</i> 92:6057-6061.                                                      |        |          |           |    |    |    |      |
| [16] Fan D, Li Q, Korando L, Jerome WG, Wang J. 2004. <i>Biochemistry</i> 43:5055-5064.                                                                                        |        |          |           |    |    |    |      |
| [17] Das D, Georgiadis MM. 2001. <i>Protein Sci</i> 10:1936-1941.                                                                                                              |        |          |           |    |    |    |      |
| [18] Li Y, Yan Y, Zugay-Murphy J, Xu B, Cole JL, Witmer M, Felock P, Wolfe A, et al. 1999. <i>Acta Crystallogr D Biol Crystallogr</i> 55:1906-1910.                            |        |          |           |    |    |    |      |
| [19] Nasreen A, Vogt M, Kim HJ, Eichinger A, Skerra A. 2006. <i>Protein Sci</i> 15:190-199.                                                                                    |        |          |           |    |    |    |      |
| [20] Agren L, Norin M, Lycke N, Lowenadler B. 1999. <i>Protein Eng</i> 12:173-178.                                                                                             |        |          |           |    |    |    |      |
| [21] Daujotyte D, Vilkaitis G, Manelyte L, Skalicky J, Szyperski T, Klimasauskas S. 2003. <i>Protein Eng</i> 16:295-301.                                                       |        |          |           |    |    |    |      |
| [22] Sun ZY, Dotsch V, Kim M, Li J, Reinherz EL, Wagner G. 1999. <i>EMBO J</i> 18:2941-2949.                                                                                   |        |          |           |    |    |    |      |
| [23] Malissard M, Berger EG. 2001. <i>Eur J Biochem</i> 268:4352-4358.                                                                                                         |        |          |           |    |    |    |      |
| [24] Zhang F, Basinski MB, Beals JM, Briggs SL, Churgay LM, Clawson DK, DiMarchi RD, Furman TC, et al. 1997. <i>Nature</i> 387:206-209.                                        |        |          |           |    |    |    |      |
| [25] Ricci MS, Pallito MM, Narhi LO, Boone T, Brems DN. 2006. <i>Misbehaving Proteins: Protein (Mis) folding, aggregation, and stability</i> . New York: Springer. pp 331-350. |        |          |           |    |    |    |      |
| [26] Bunn HF, Forget BG. 1986. <i>Hemoglobin: Molecular, genetic and clinical aspects</i> . Philadelphia: W. B. Saunders Co. pp 381-594.                                       |        |          |           |    |    |    |      |
| [27] Charache S, Conley CL, Waugh DF, Ugoretz RJ, Spurrell JR. 1967. <i>J Clin Invest</i> 46:1795-1811.                                                                        |        |          |           |    |    |    |      |
| [28] Dudgeon K, Rouet R, Kokmeijer I, Schofield P, Stolp J, Langley D, Stock D, Christ D. 2012. <i>Proc Natl Acad Sci USA</i> . 109:10879-10884.                               |        |          |           |    |    |    |      |

Figure S1

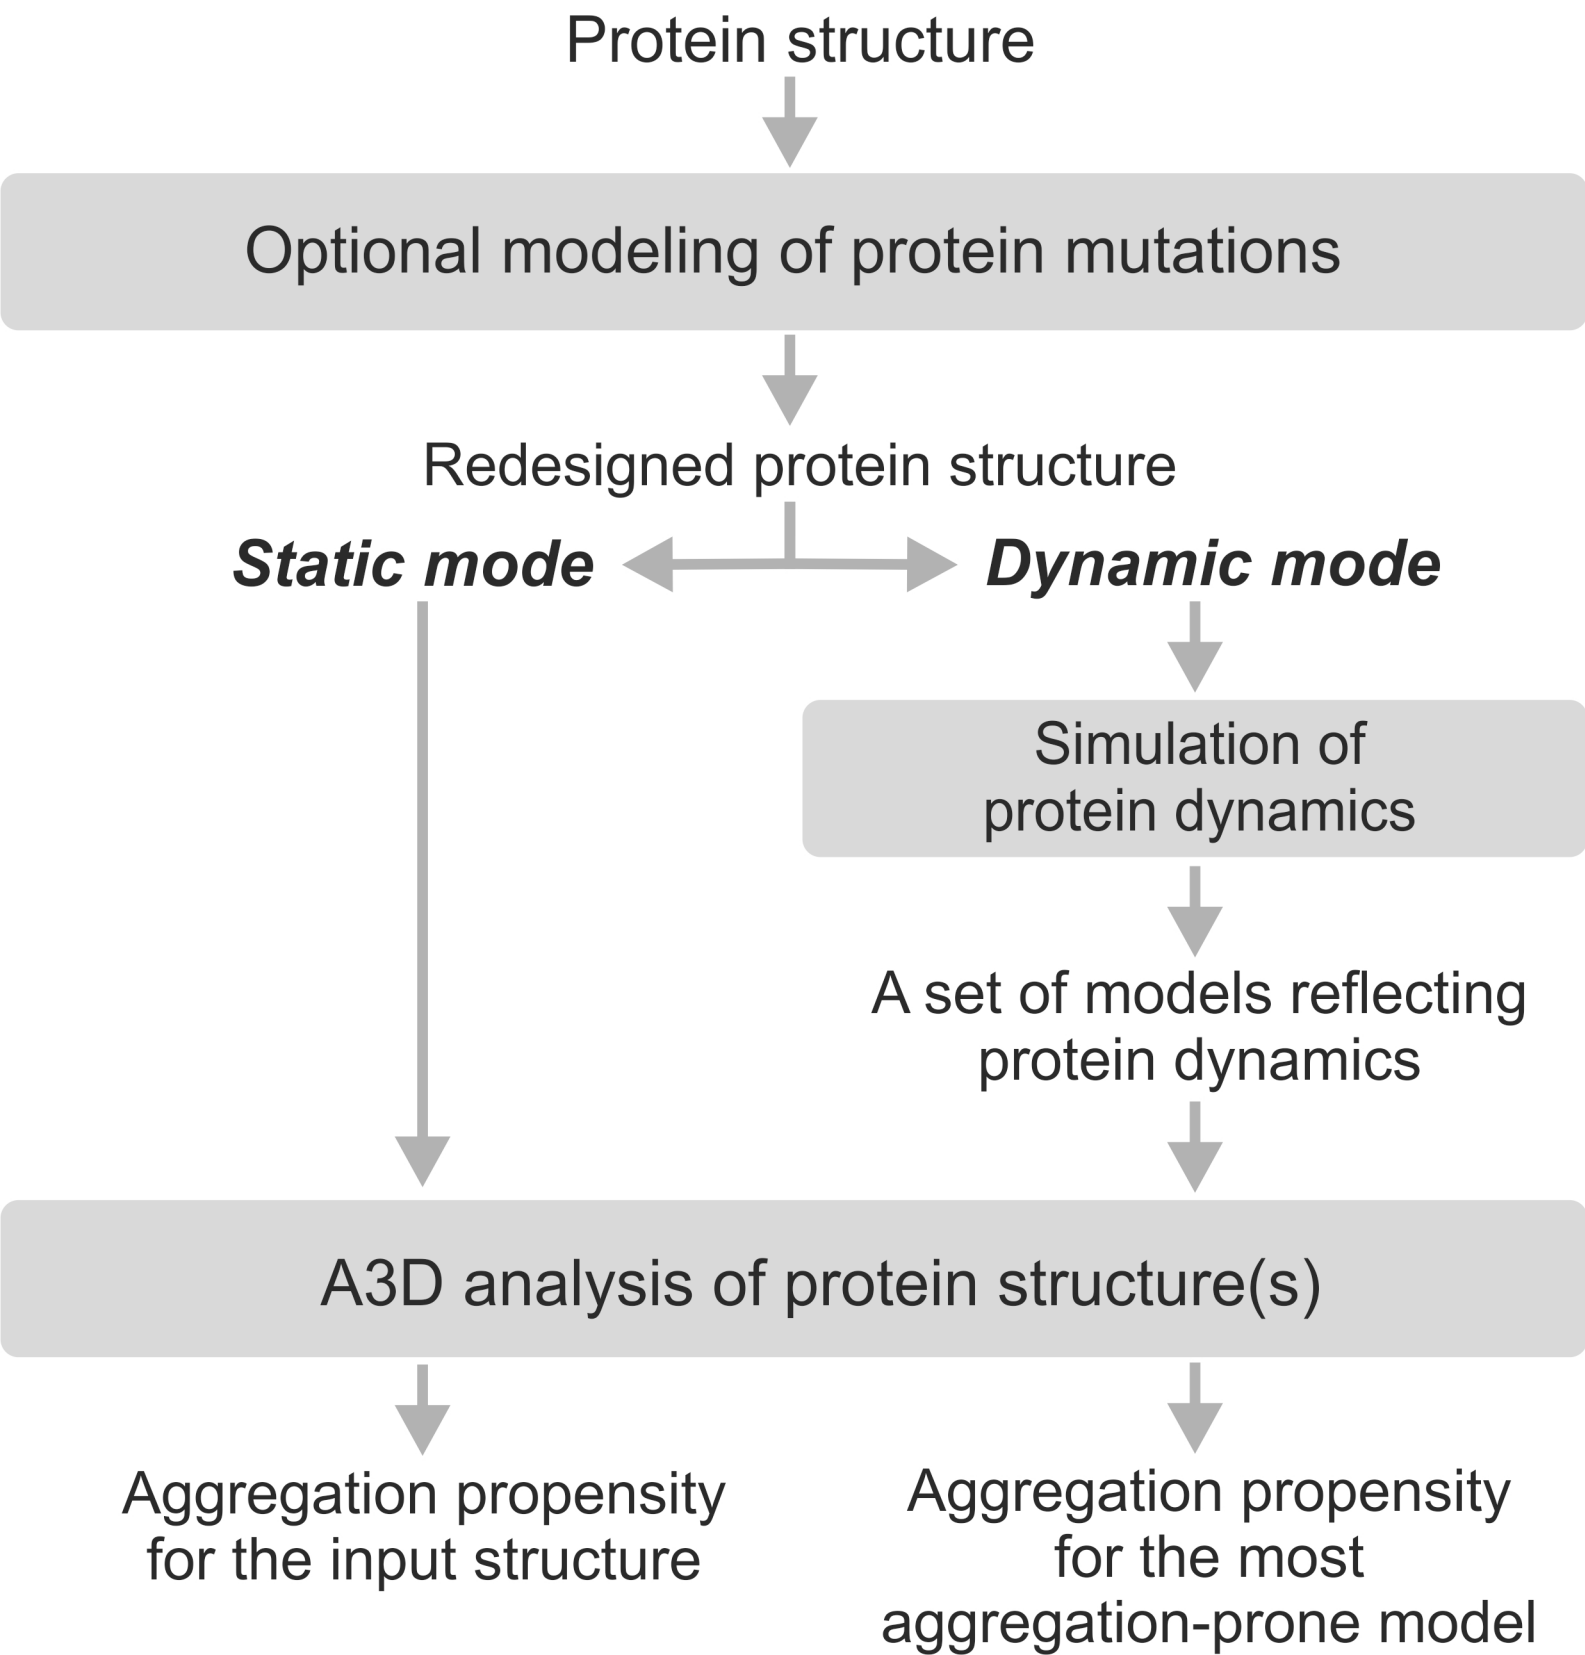

Figure S2

a

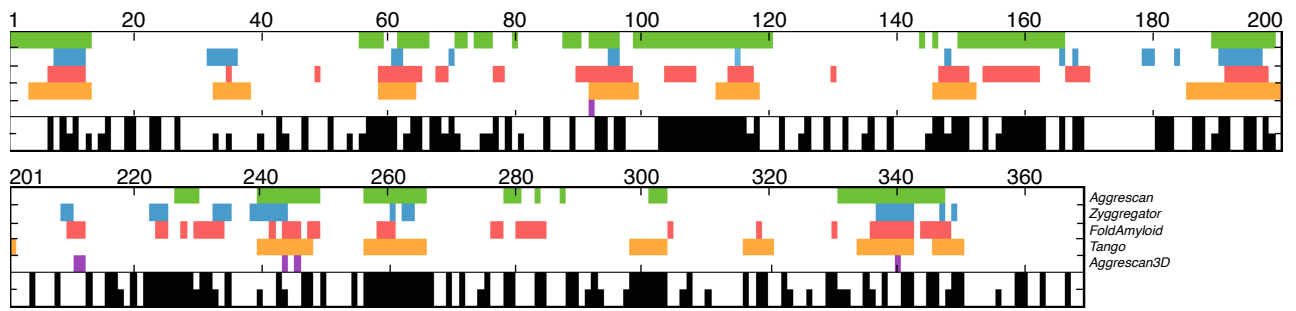

b

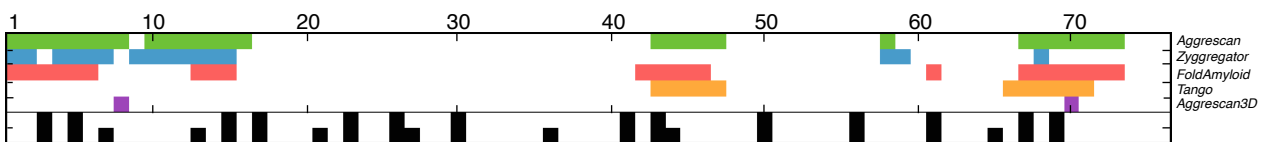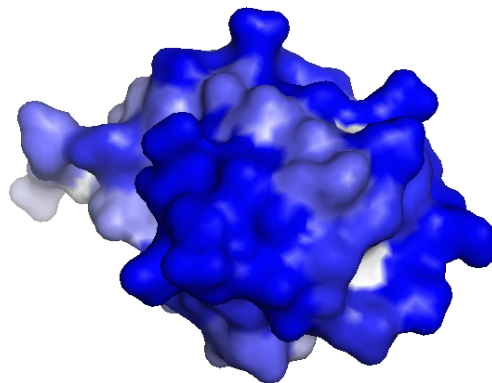

Figure S3

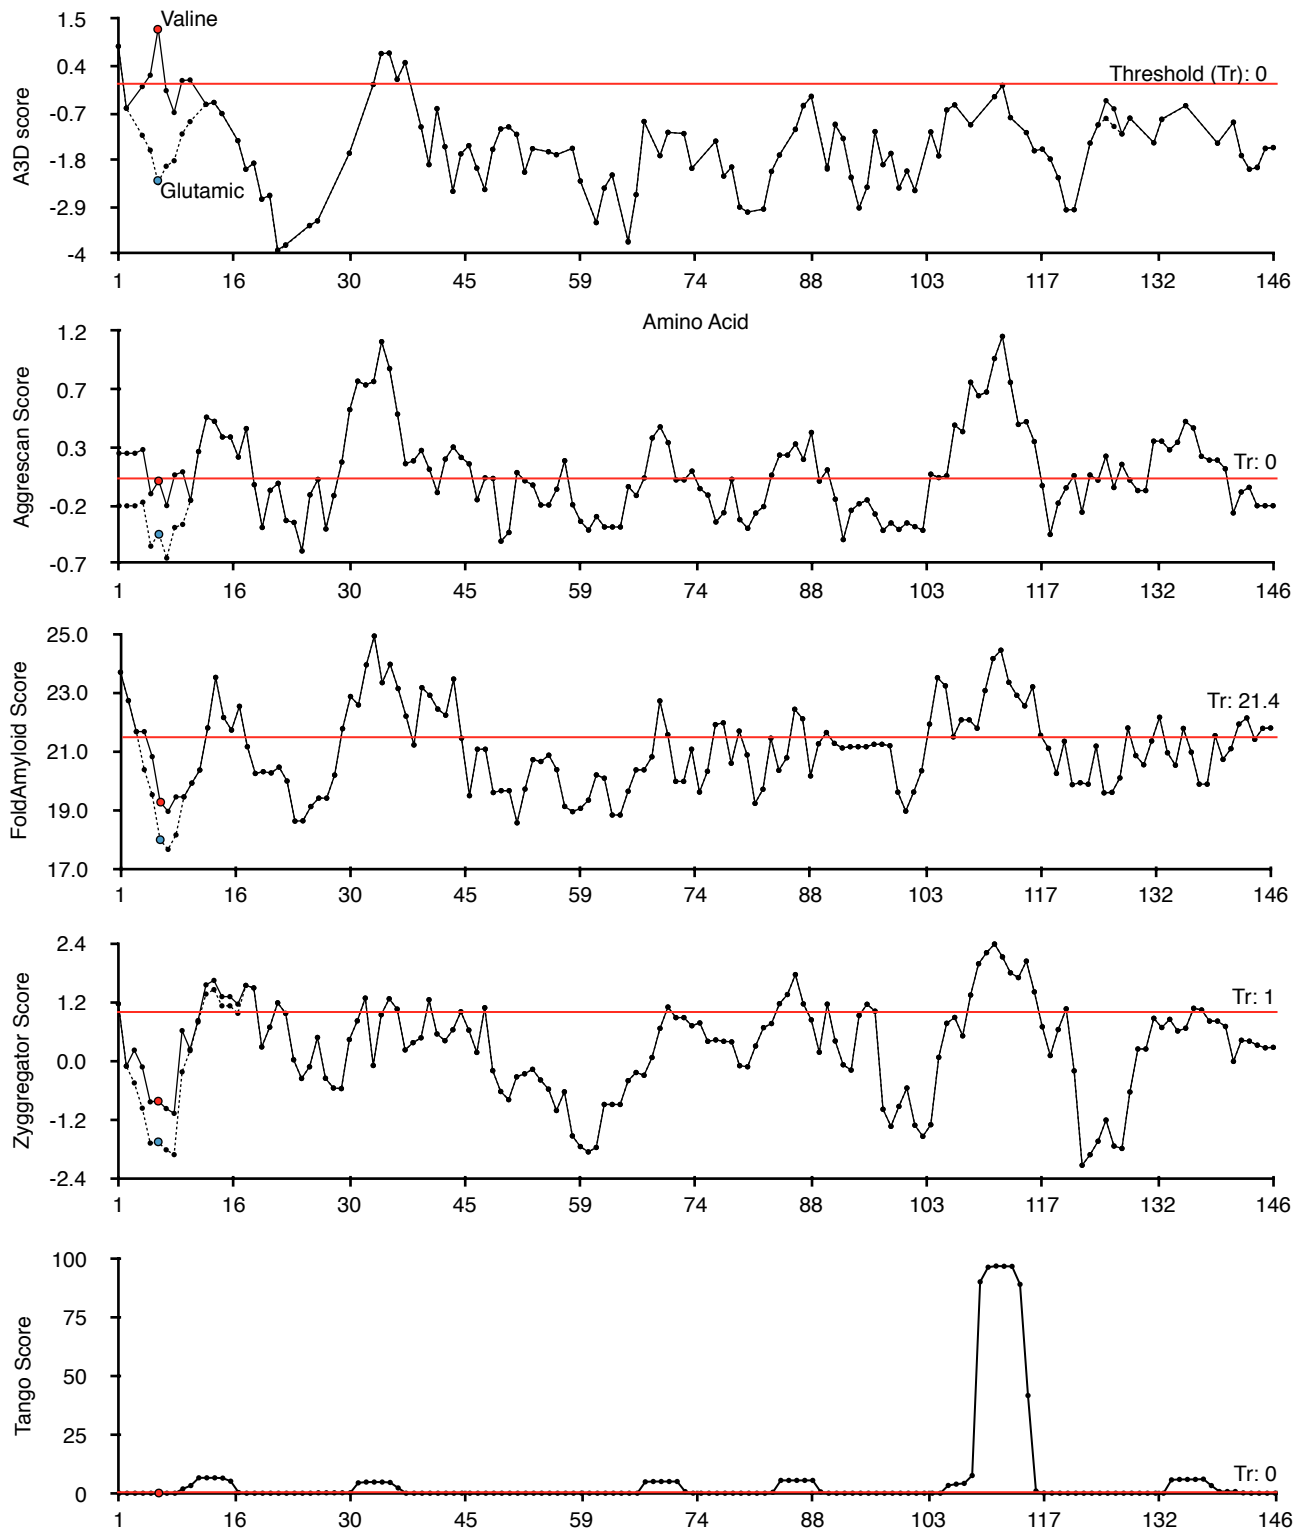



Figure S4

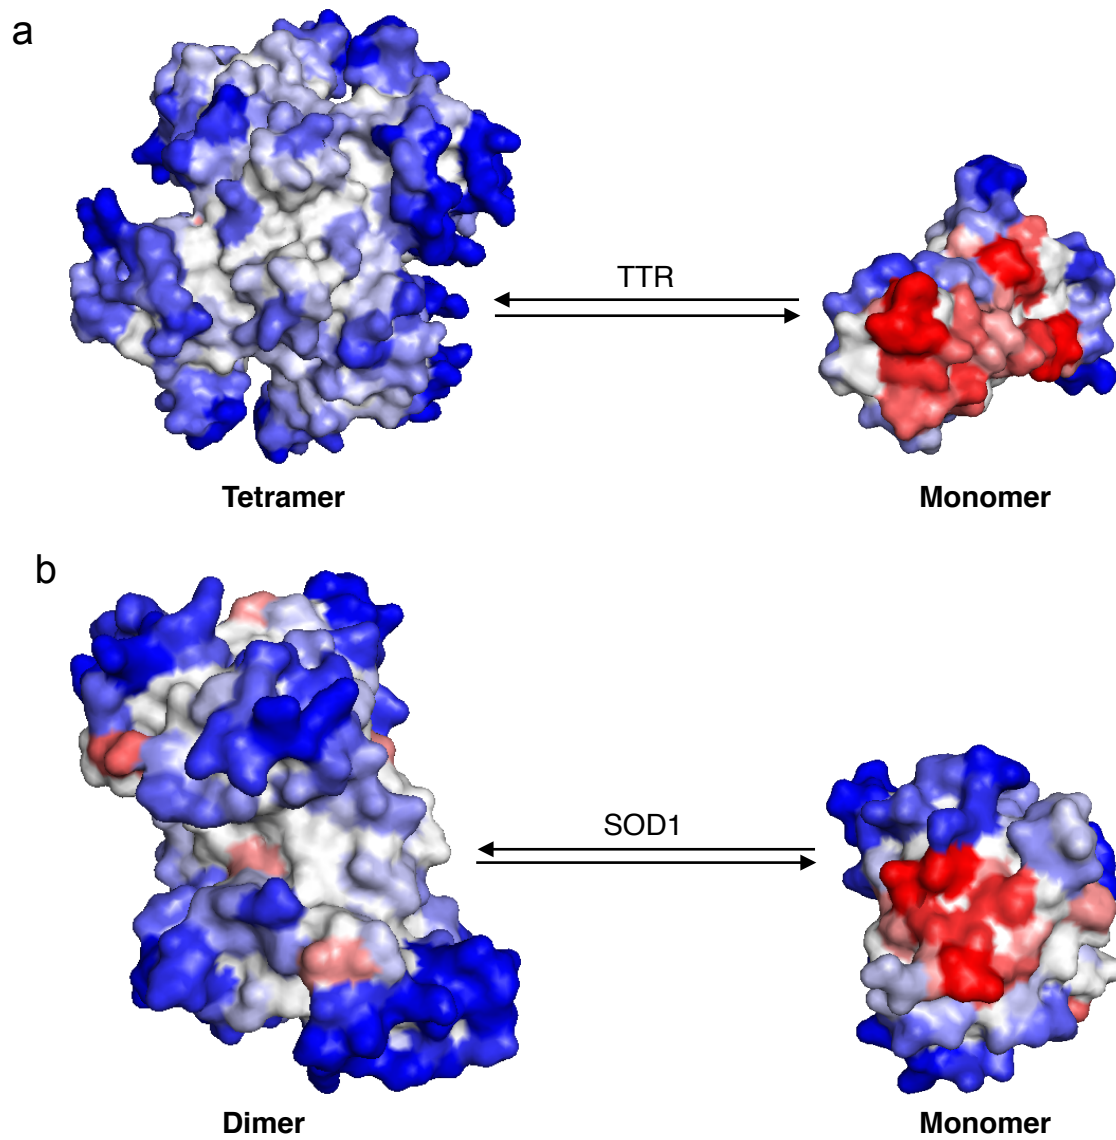

Figure S5

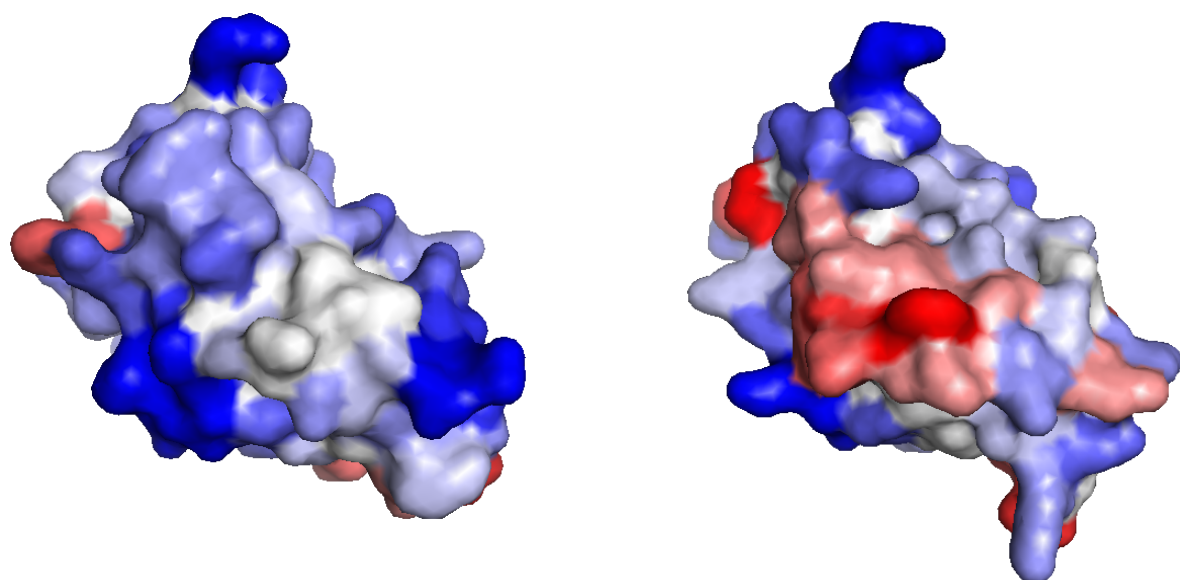

Supplement: supp_gkv359_nar-00239-web-b-2015-File006.pdf [file supp_gkv359_nar-00239-web-b-2015-File006.pdf]
